# Supplementary material for: Reconstructed signaling and regulatory networks identify potential drugs for SARS-CoV-2 infection
Source: bioRxiv or medRxiv preprint supplement (doi:10.1101/2020.06.01.127589), 2021-12-09

A

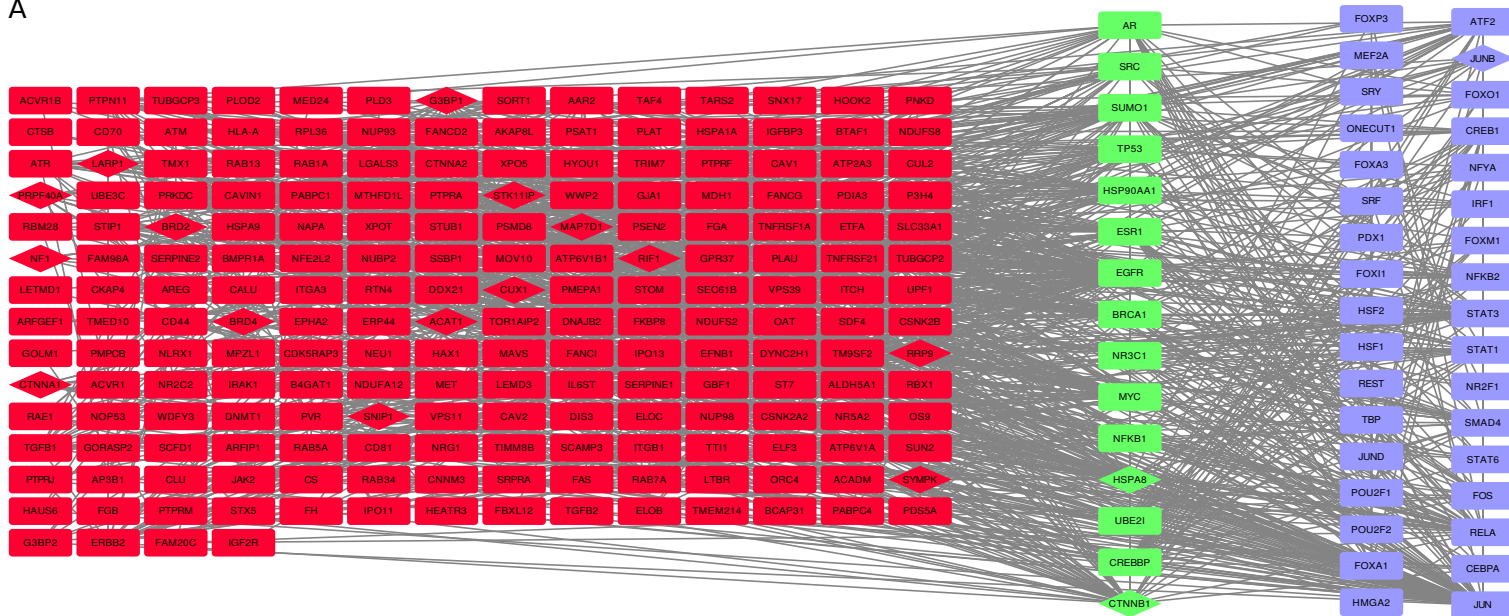

B

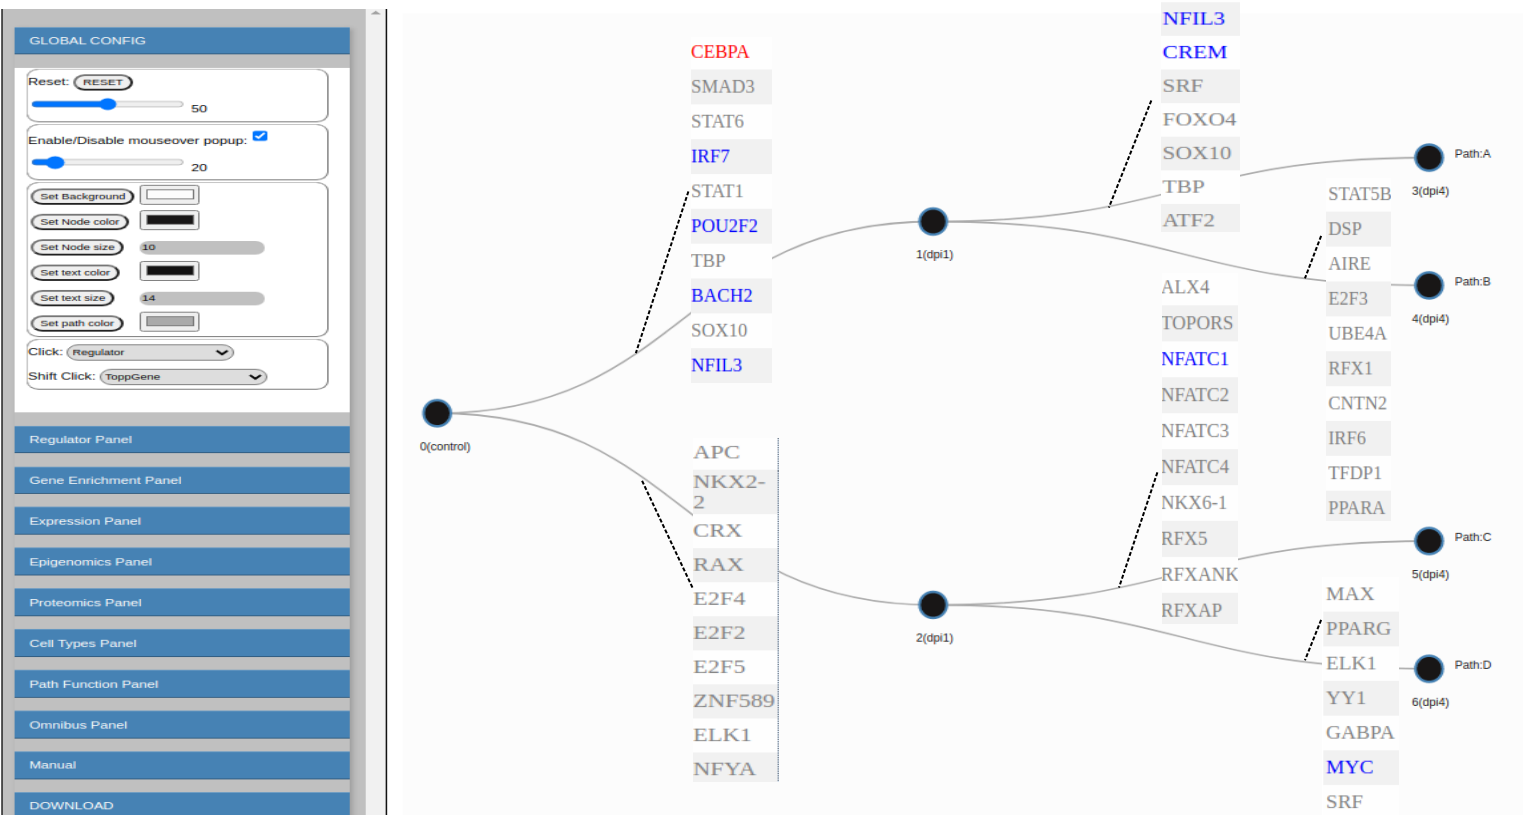

Supplement: Supplementary file [file media-1.pdf]
