# Supplementary material for: Reconstructed signaling and regulatory networks identify potential drugs for SARS-CoV-2 infection
Source: bioRxiv or medRxiv preprint supplement (doi:10.1101/2020.06.01.127589), 2021-12-09
Supplement: Supplementary file [file media-2.pdf]

**A**

Sum threshold

|      | 0        | 1        | 2        | 3        | 4        | 5        | 6 |
|------|----------|----------|----------|----------|----------|----------|---|
| 0.01 | 0.525971 | 1.67E-05 | 0.188794 | 1        | 1        | 1        | 1 |
| 0.05 | 0.525971 | 6.91E-06 | 7.27E-06 | 0.292627 | 1        | 1        | 1 |
| 0.1  | 0.525971 | 0.000209 | 3.03E-06 | 2.56E-05 | 0.022711 | 0.027533 | 1 |
| 0.15 | 0.525971 | 0.00267  | 2.88E-08 | 2.48E-05 | 0.142231 | 0.097275 | 1 |
| 0.2  | 0.525971 | 0.012907 | 1.50E-08 | 2.46E-07 | 0.130738 | 0.209256 | 1 |
| 0.25 | 0.525971 | 0.01349  | 1.52E-07 | 5.66E-07 | 0.321113 | 1        | 1 |
| 0.3  | 0.525971 | 0.099369 | 0.000115 | 1.74E-05 | 0.276062 | 1        | 1 |

**B**

Sum threshold

|      | 0   | 1  | 2  | 3  | 4 | 5 | 6 |
|------|-----|----|----|----|---|---|---|
| 0.01 | 118 | 23 | 1  | 0  | 0 | 0 | 0 |
| 0.05 | 118 | 62 | 14 | 1  | 0 | 0 | 0 |
| 0.1  | 118 | 78 | 25 | 9  | 2 | 1 | 0 |
| 0.15 | 118 | 84 | 39 | 13 | 2 | 1 | 0 |
| 0.2  | 118 | 88 | 48 | 20 | 3 | 1 | 0 |
| 0.25 | 118 | 94 | 53 | 23 | 3 | 0 | 0 |
| 0.3  | 118 | 88 | 50 | 23 | 4 | 0 | 0 |

**C**

| gene_symbol | hypertension | COPD | diabetes | smoke | cancer | sex | age | sum |
|-------------|--------------|------|----------|-------|--------|-----|-----|-----|
| cav1        | -1           | -1   | -1       | -1    | -1     | 0   | 0   | -5  |
| ube2i       | 0            | -1   | -1       | -1    | -1     | 0   | 0   | -4  |
| jun         | -1           | 1    | -1       | -1    | -1     | -1  | 0   | -4  |
| atp6v1a     | -1           | -1   | -1       | 1     | -1     | 0   | 0   | -3  |
| irf1        | -1           | 0    | 1        | -1    | -1     | 0   | -1  | -3  |
| erbb2       | 1            | -1   | 0        | -1    | -1     | 0   | -1  | -3  |
| fos         | -1           | 0    | 1        | -1    | -1     | 0   | -1  | -3  |
| raly        | 0            | 0    | -1       | -1    | 0      | -1  | 0   | -3  |
| acat1       | 0            | -1   | -1       | 0     | 0      | -1  | 0   | -3  |
| hsf1        | -1           | 0    | 0        | -1    | 0      | -1  | 0   | -3  |
| ctnna1      | 0            | -1   | 0        | -1    | -1     | 0   | 0   | -3  |
| brd2        | -1           | 1    | -1       | -1    | -1     | -1  | 1   | -3  |
| nfe2l2      | -1           | -1   | 1        | 0     | -1     | 0   | 0   | -2  |
| dis3        | -1           | 0    | 0        | -1    | -1     | 0   | 1   | -2  |
| myc         | -1           | 1    | 0        | 0     | 0      | -1  | -1  | -2  |
| akap8l      | 0            | -1   | -1       | 0     | 0      | -1  | 1   | -2  |
| foxa3       | -1           | 0    | 0        | 0     | 0      | 0   | -1  | -2  |
| stx4        | -1           | -1   | 0        | 0     | 0      | 0   | 0   | -2  |
| junb        | -1           | 1    | 0        | 0     | -1     | -1  | 0   | -2  |
| srf         | -1           | 1    | 0        | -1    | -1     | 0   | 0   | -2  |
| sox12       | 0            | -1   | 0        | -1    | 0      | 0   | 0   | -2  |
| mef2a       | 0            | 0    | 0        | -1    | -1     | 0   | 0   | -2  |
| stat6       | 0            | 0    | -1       | -1    | -1     | 0   | 1   | -2  |
| clu         | 1            | -1   | -1       | -1    | -1     | 0   | 1   | -2  |
| nr2f1       | 0            | -1   | 0        | -1    | -1     | 0   | 1   | -2  |
| sox10       | 0            | 1    | 1        | 1     | -1     | 0   | 0   | 2   |
| sympk       | 0            | 0    | 0        | 0     | 0      | 1   | 1   | 2   |
| ep300       | 0            | 0    | 1        | -1    | 0      | 1   | 1   | 2   |
| cul2        | 0            | 1    | 0        | 0     | 0      | 0   | 1   | 2   |
| atm         | 1            | 1    | 0        | 1     | -1     | 0   | 0   | 2   |
| atr         | 1            | 0    | 0        | 0     | 1      | 0   | 0   | 2   |
| g3bp1       | 0            | 0    | -1       | 1     | 1      | 0   | 1   | 2   |
| rif1        | 0            | 1    | 0        | 0     | -1     | 1   | 1   | 2   |
| ptrj        | -1           | 1    | 1        | 0     | 0      | 1   | 0   | 2   |
| prpf40a     | 0            | 0    | 0        | 1     | 1      | -1  | 1   | 2   |
| oat         | 1            | 0    | -1       | 0     | 1      | 1   | 0   | 2   |
| rad18       | 1            | 0    | 0        | 0     | 0      | 0   | 1   | 2   |
| smad3       | 0            | -1   | 1        | -1    | 1      | 1   | 1   | 2   |
| foxm1       | 1            | 0    | 0        | 0     | 1      | 0   | 0   | 2   |
| larp1       | 0            | 0    | 1        | -1    | 1      | 0   | 1   | 2   |
| brca1       | 1            | 0    | 0        | 1     | 1      | 0   | 0   | 3   |
| onecut1     | 0            | 1    | -1       | 1     | 1      | 0   | 1   | 3   |
| sox2        | 1            | -1   | 1        | 1     | 1      | 0   | 0   | 3   |
| zc3h18      | 0            | 1    | 0        | 0     | 0      | 1   | 1   | 3   |
| plau        | 0            | 0    | 0        | 1     | 1      | 1   | 0   | 3   |
| itch        | 0            | 1    | 0        | 1     | 0      | 0   | 1   | 3   |
| csnk2b      | 1            | 1    | 0        | 0     | 1      | 0   | 0   | 3   |
| pdia3       | 0            | 1    | -1       | 0     | 1      | 1   | 1   | 3   |

**D**

| GO biological process complete                                          | raw P value | FDR      |
|-------------------------------------------------------------------------|-------------|----------|
| positive regulation of nitrogen compound metabolic process              | 3.34E-17    | 5.31E-13 |
| positive regulation of cellular metabolic process                       | 2.03E-16    | 1.61E-12 |
| positive regulation of macromolecule metabolic process                  | 9.69E-16    | 5.13E-12 |
| positive regulation of cellular biosynthetic process                    | 4.28E-15    | 1.70E-11 |
| positive regulation of biosynthetic process                             | 6.49E-15    | 2.06E-11 |
| positive regulation of transcription by RNA polymerase II               | 8.40E-15    | 2.23E-11 |
| positive regulation of metabolic process                                | 1.33E-14    | 2.64E-11 |
| positive regulation of macromolecule biosynthetic process               | 1.22E-14    | 2.77E-11 |
| positive regulation of cellular process                                 | 1.76E-14    | 3.10E-11 |
| positive regulation of nucleobase-containing compound metabolic process | 1.24E-13    | 1.79E-10 |
| positive regulation of transcription, DNA-templated                     | 1.18E-13    | 1.87E-10 |
| positive regulation of gene expression                                  | 1.88E-13    | 2.49E-10 |
| positive regulation of RNA biosynthetic process                         | 3.90E-13    | 4.43E-10 |
| regulation of transcription by RNA polymerase II                        | 4.30E-13    | 4.56E-10 |
| positive regulation of nucleic acid-templated transcription             | 3.85E-13    | 4.70E-10 |
| regulation of macromolecule biosynthetic process                        | 5.23E-13    | 5.20E-10 |
| regulation of nucleobase-containing compound metabolic process          | 6.35E-13    | 5.61E-10 |
| regulation of RNA metabolic process                                     | 6.21E-13    | 5.81E-10 |
| positive regulation of biological process                               | 7.03E-13    | 5.88E-10 |
| regulation of nitrogen compound metabolic process                       | 7.51E-13    | 5.97E-10 |
| regulation of cellular metabolic process                                | 1.09E-12    | 8.24E-10 |
| positive regulation of RNA metabolic process                            | 1.25E-12    | 9.02E-10 |
| regulation of cellular macromolecule biosynthetic process               | 1.52E-12    | 1.05E-09 |
| regulation of cellular biosynthetic process                             | 1.59E-12    | 1.06E-09 |
| regulation of primary metabolic process                                 | 2.43E-12    | 1.54E-09 |
