# Supplementary material for: Reconstructed signaling and regulatory networks identify potential drugs for SARS-CoV-2 infection
Source: bioRxiv or medRxiv preprint supplement (doi:10.1101/2020.06.01.127589), 2021-12-09
Supplement: Supplementary file [file media-3.pdf]

**A**

Sum threshold

| quantile | 0        | 1        | 2        | 3        | 4        | 5        | 6        |
|----------|----------|----------|----------|----------|----------|----------|----------|
| 0.01     | 0.521784 | 3.41E-09 | 0.257172 | 1        | 1        | 1        | 1        |
| 0.05     | 0.521784 | 1.12E-09 | 7.47E-05 | 0.087696 | 1        | 1        | 1        |
| 0.1      | 0.521784 | 5.46E-06 | 6.72E-10 | 1.28E-05 | 0.042956 | 0.038893 | 1        |
| 0.15     | 0.521784 | 0.001791 | 1.06E-09 | 5.79E-08 | 0.015509 | 0.13533  | 1        |
| 0.2      | 0.521784 | 0.003871 | 1.11E-10 | 5.77E-09 | 0.00053  | 0.283653 | 1        |
| 0.25     | 0.521784 | 0.012143 | 5.80E-10 | 1.56E-10 | 0.009083 | 0.125431 | 1        |
| 0.3      | 0.521784 | 0.02944  | 6.04E-07 | 1.09E-08 | 0.005948 | 0.29093  | 0.216887 |

**B**

Sum threshold

| quantile | 0   | 1   | 2  | 3  | 4  | 5 | 6 |
|----------|-----|-----|----|----|----|---|---|
| 0.01     | 168 | 37  | 1  | 0  | 0  | 0 | 0 |
| 0.05     | 168 | 96  | 15 | 2  | 0  | 0 | 0 |
| 0.1      | 168 | 113 | 39 | 11 | 2  | 1 | 0 |
| 0.15     | 168 | 114 | 52 | 20 | 4  | 1 | 0 |
| 0.2      | 168 | 125 | 66 | 27 | 8  | 1 | 0 |
| 0.25     | 168 | 128 | 75 | 35 | 8  | 2 | 0 |
| 0.3      | 168 | 130 | 75 | 36 | 10 | 2 | 1 |

**C**

| gene_symbol | hypertension | COPD | diabetes | smoke | cancer | sex | age | sum |
|-------------|--------------|------|----------|-------|--------|-----|-----|-----|
| cav1        | -1           | -1   | -1       | -1    | -1     | 0   | 0   | -5  |
| rtn4        | -1           | -1   | -1       | 0     | -1     | 0   | 0   | -4  |
| b4gat1      | 0            | 0    | 0        | -1    | -1     | -1  | -1  | -4  |
| wwp2        | 0            | -1   | -1       | -1    | -1     | 0   | 0   | -4  |
| ube2i       | 0            | -1   | -1       | -1    | -1     | 0   | 0   | -4  |
| jun         | -1           | 1    | -1       | -1    | -1     | -1  | 0   | -4  |
| stom        | -1           | -1   | 1        | -1    | -1     | 0   | 0   | -3  |
| tgfb2       | 0            | 0    | -1       | -1    | -1     | 0   | 0   | -3  |
| erbb2       | 1            | -1   | 0        | -1    | -1     | 0   | -1  | -3  |
| fos         | -1           | 0    | 1        | -1    | -1     | 0   | -1  | -3  |
| raly        | 0            | 0    | -1       | -1    | 0      | -1  | 0   | -3  |
| acat1       | 0            | -1   | -1       | 0     | 0      | -1  | 0   | -3  |
| hsf1        | -1           | 0    | 0        | -1    | 0      | -1  | 0   | -3  |
| ctnna1      | 0            | -1   | 0        | -1    | -1     | 0   | 0   | -3  |
| brd2        | -1           | 1    | -1       | -1    | -1     | -1  | 1   | -3  |
| nfe2l2      | -1           | -1   | 1        | 0     | -1     | 0   | 0   | -2  |
| myc         | -1           | 1    | 0        | 0     | 0      | -1  | -1  | -2  |
| aar2        | -1           | 0    | 0        | -1    | 0      | -1  | 1   | -2  |
| akap8l      | 0            | -1   | -1       | 0     | 0      | -1  | 1   | -2  |
| nubp2       | 0            | 0    | -1       | -1    | 0      | 0   | 0   | -2  |
| stx4        | -1           | -1   | 0        | 0     | 0      | 0   | 0   | -2  |
| junb        | -1           | 1    | 0        | 0     | -1     | -1  | 0   | -2  |
| snx17       | 0            | -1   | 1        | -1    | -1     | 0   | 0   | -2  |
| jak2        | -1           | 1    | 0        | -1    | -1     | 0   | 0   | -2  |
| ctnna2      | 0            | 0    | -1       | 0     | -1     | 1   | -1  | -2  |
| epha2       | -1           | 1    | -1       | 0     | 0      | -1  | 0   | -2  |
| srf         | -1           | 1    | 0        | -1    | -1     | 0   | 0   | -2  |
| dnajb2      | 0            | -1   | 0        | -1    | 0      | 0   | 0   | -2  |
| clu         | 1            | -1   | -1       | -1    | -1     | 0   | 1   | -2  |
| plat        | -1           | 0    | 0        | -1    | 0      | -1  | 1   | -2  |
| ints1       | 0            | 0    | 1        | 0     | 1      | 0   | 0   | 2   |
| sympk       | 0            | 0    | 0        | 0     | 0      | 1   | 1   | 2   |
| ep300       | 0            | 0    | 1        | -1    | 0      | 1   | 1   | 2   |
| il6st       | 0            | 1    | 1        | 1     | -1     | 0   | 0   | 2   |
| rab1a       | 0            | 1    | 0        | -1    | 1      | 0   | 1   | 2   |
| cul2        | 0            | 1    | 0        | 0     | 0      | 0   | 1   | 2   |
| atm         | 1            | 1    | 0        | 1     | -1     | 0   | 0   | 2   |
| atr         | 1            | 0    | 0        | 0     | 1      | 0   | 0   | 2   |
| g3bp1       | 0            | 0    | -1       | 1     | 1      | 0   | 1   | 2   |
| cd70        | 0            | 1    | 0        | 0     | 1      | 0   | 0   | 2   |
| os9         | 0            | 0    | 0        | -1    | 1      | 1   | 1   | 2   |
| ints2       | 1            | 1    | 0        | 0     | 0      | 0   | 0   | 2   |
| irak1       | 0            | 0    | 0        | 0     | 1      | 1   | 0   | 2   |
| cs          | 0            | 0    | 1        | 0     | 1      | 0   | 0   | 2   |
| lox         | -1           | 0    | 1        | 0     | 0      | 1   | 1   | 2   |
| ptprj       | -1           | 1    | 1        | 0     | 0      | 1   | 0   | 2   |
| prpf40a     | 0            | 0    | 0        | 1     | 1      | -1  | 1   | 2   |
| oat         | 1            | 0    | -1       | 0     | 1      | 1   | 0   | 2   |
| mpzl1       | 0            | 1    | -1       | 1     | 1      | 0   | 0   | 2   |
| fgb         | -1           | 0    | 1        | 1     | 1      | 1   | -1  | 2   |
| rad18       | 1            | 0    | 0        | 0     | 0      | 0   | 1   | 2   |
| smad3       | 0            | -1   | 1        | -1    | 1      | 1   | 1   | 2   |
| foxm1       | 1            | 0    | 0        | 0     | 1      | 0   | 0   | 2   |
| larp1       | 0            | 0    | 1        | -1    | 1      | 0   | 1   | 2   |
| brca1       | 1            | 0    | 0        | 1     | 1      | 0   | 0   | 3   |
| sox2        | 1            | -1   | 1        | 1     | 1      | 0   | 0   | 3   |
| serpine2    | 1            | 0    | 0        | 0     | 1      | 0   | 1   | 3   |
| zc3h18      | 0            | 1    | 0        | 0     | 0      | 1   | 1   | 3   |
| plau        | 0            | 0    | 0        | 1     | 1      | 1   | 0   | 3   |
| ctsb        | 1            | 1    | 0        | 1     | -1     | 1   | 0   | 3   |
| itch        | 0            | 1    | 0        | 1     | 0      | 0   | 1   | 3   |
| csnk2b      | 1            | 1    | 0        | 0     | 1      | 0   | 0   | 3   |
| pfkp        | 0            | 1    | 0        | 0     | 1      | 1   | 0   | 3   |
| pdia3       | 0            | 1    | -1       | 0     | 1      | 1   | 1   | 3   |
| nup93       | 0            | 1    | 0        | 0     | 1      | 1   | 1   | 4   |
| neu1        | -1           | 1    | 1        | 1     | 1      | 0   | 1   | 4   |

**D**

|                                                                            | raw P value | ▲ FDR    |
|----------------------------------------------------------------------------|-------------|----------|
| <a href="#">GO biological process complete</a>                             |             |          |
| <a href="#">regulation of protein metabolic process</a>                    | 1.24E-13    | 1.97E-09 |
| <a href="#">regulation of cellular protein metabolic process</a>           | 9.37E-13    | 4.97E-09 |
| <a href="#">response to stress</a>                                         | 1.31E-12    | 5.22E-09 |
| <a href="#">symbiotic process</a>                                          | 2.09E-12    | 5.55E-09 |
| <a href="#">positive regulation of protein metabolic process</a>           | 7.24E-13    | 5.75E-09 |
| <a href="#">positive regulation of cellular process</a>                    | 1.84E-12    | 5.84E-09 |
| <a href="#">response to organic substance</a>                              | 2.69E-11    | 3.29E-08 |
| <a href="#">regulation of cell population proliferation</a>                | 1.72E-11    | 3.42E-08 |
| <a href="#">primary metabolic process</a>                                  | 1.98E-11    | 3.49E-08 |
| <a href="#">regulation of cell communication</a>                           | 2.68E-11    | 3.56E-08 |
| <a href="#">response to hypoxia</a>                                        | 1.60E-11    | 3.62E-08 |
| <a href="#">viral process</a>                                              | 2.63E-11    | 3.80E-08 |
| <a href="#">response to decreased oxygen levels</a>                        | 2.56E-11    | 4.06E-08 |
| <a href="#">regulation of signaling</a>                                    | 3.71E-11    | 4.21E-08 |
| <a href="#">response to oxygen levels</a>                                  | 6.02E-11    | 6.38E-08 |
| <a href="#">positive regulation of cellular protein metabolic process</a>  | 6.79E-11    | 6.74E-08 |
| <a href="#">positive regulation of biological process</a>                  | 9.46E-11    | 8.36E-08 |
| <a href="#">regulation of signal transduction</a>                          | 9.32E-11    | 8.71E-08 |
| <a href="#">positive regulation of cellular metabolic process</a>          | 1.26E-10    | 1.06E-07 |
| <a href="#">positive regulation of nitrogen compound metabolic process</a> | 1.37E-10    | 1.09E-07 |
| <a href="#">organic substance metabolic process</a>                        | 1.46E-10    | 1.11E-07 |
| <a href="#">response to abiotic stimulus</a>                               | 2.07E-10    | 1.50E-07 |
| <a href="#">positive regulation of metabolic process</a>                   | 2.20E-10    | 1.52E-07 |
| <a href="#">regulation of protein modification process</a>                 | 2.42E-10    | 1.60E-07 |
| <a href="#">regulation of cell adhesion</a>                                | 3.01E-10    | 1.91E-07 |
| <a href="#">regulation of cell motility</a>                                | 3.41E-10    | 2.09E-07 |
| <a href="#">apoptotic signaling pathway</a>                                | 3.65E-10    | 2.15E-07 |
| <a href="#">positive regulation of macromolecule metabolic process</a>     | 4.87E-10    | 2.77E-07 |
| <a href="#">response to chemical</a>                                       | 5.46E-10    | 2.99E-07 |
