# Supplementary material for: Reconstructed signaling and regulatory networks identify potential drugs for SARS-CoV-2 infection
Source: bioRxiv or medRxiv preprint supplement (doi:10.1101/2020.06.01.127589), 2021-12-09
Supplement: Supplementary file [file media-4.pdf]

Top 100 genes + TFs analysis for scRNA-seq SDREM model with protein phosphorylation data integrated

**A**

|          |      | Sum threshold |          |          |          |          |          |   |
|----------|------|---------------|----------|----------|----------|----------|----------|---|
|          |      | 0             | 1        | 2        | 3        | 4        | 5        | 6 |
| quantile | 0.01 | 0.525038      | 6.33E-06 | 0.201545 | 1        | 1        | 1        | 1 |
|          | 0.05 | 0.525038      | 1.56E-07 | 1.56E-05 | 0.310931 | 1        | 1        | 1 |
|          | 0.1  | 0.525038      | 8.51E-07 | 1.03E-10 | 0.000248 | 0.002088 | 0.029587 | 1 |
|          | 0.15 | 0.525038      | 0.000188 | 1.19E-09 | 2.79E-06 | 0.006142 | 0.104244 | 1 |
|          | 0.2  | 0.525038      | 0.00477  | 1.36E-09 | 6.93E-07 | 0.012293 | 0.22319  | 1 |
|          | 0.25 | 0.525038      | 0.007227 | 2.11E-11 | 1.28E-08 | 0.170602 | 0.079134 | 1 |
|          | 0.3  | 0.525038      | 0.03262  | 1.56E-07 | 8.06E-07 | 0.009743 | 0.195827 | 1 |

**B**

|          |      | Sum threshold |     |    |    |   |   |   |
|----------|------|---------------|-----|----|----|---|---|---|
|          |      | 0             | 1   | 2  | 3  | 4 | 5 | 6 |
| quantile | 0.01 | 127           | 25  | 1  | 0  | 0 | 0 | 0 |
|          | 0.05 | 127           | 72  | 14 | 1  | 0 | 0 | 0 |
|          | 0.1  | 127           | 96  | 35 | 8  | 3 | 1 | 0 |
|          | 0.15 | 127           | 98  | 44 | 15 | 4 | 1 | 0 |
|          | 0.2  | 127           | 98  | 53 | 20 | 5 | 1 | 0 |
|          | 0.25 | 127           | 103 | 67 | 27 | 4 | 2 | 0 |
|          | 0.3  | 127           | 101 | 64 | 27 | 8 | 2 | 0 |

**C**

| gene_symbol | hypertension | COPD | diabetes | smoke | cancer | sex | age | sum |
|-------------|--------------|------|----------|-------|--------|-----|-----|-----|
| nr3c1       | -1           | -1   | -1       | -1    | -1     | 0   | 0   | -5  |
| cav1        | -1           | -1   | -1       | -1    | -1     | 1   | 0   | -4  |
| jun         | -1           | 1    | -1       | -1    | -1     | -1  | 0   | -4  |
| hspa8       | -1           | -1   | 0        | 0     | 0      | -1  | 0   | -3  |
| erbb2       | 1            | -1   | 0        | -1    | -1     | 0   | -1  | -3  |
| srf         | -1           | 1    | -1       | -1    | -1     | 0   | 0   | -3  |
| fos         | -1           | 0    | 1        | -1    | -1     | 0   | -1  | -3  |
| acat1       | 0            | -1   | -1       | -1    | 0      | -1  | 1   | -3  |
| apc         | 0            | -1   | -1       | 0     | -1     | 0   | 0   | -3  |
| mafk        | -1           | 0    | 0        | -1    | 0      | 0   | -1  | -3  |
| ctnna1      | 1            | -1   | 0        | -1    | -1     | -1  | 0   | -3  |
| mzf1        | 0            | -1   | 0        | -1    | -1     | 1   | -1  | -3  |
| brd2        | -1           | 1    | -1       | -1    | -1     | -1  | 1   | -3  |
| mcm3ap      | 0            | -1   | 0        | -1    | 0      | -1  | 0   | -3  |
| myc         | -1           | 1    | 0        | 0     | 0      | -1  | -1  | -2  |
| akap8l      | 0            | -1   | -1       | 0     | 0      | -1  | 1   | -2  |
| atf3        | -1           | 1    | 0        | 0     | -1     | 0   | -1  | -2  |
| rxra        | 0            | -1   | 0        | -1    | -1     | 0   | 1   | -2  |
| stx4        | -1           | -1   | 0        | 0     | 0      | 0   | 0   | -2  |
| creb1       | 0            | -1   | 1        | 1     | -1     | -1  | -1  | -2  |
| junb        | -1           | 1    | 0        | 0     | -1     | -1  | 0   | -2  |
| bach1       | -1           | -1   | 0        | 0     | 0      | 0   | 0   | -2  |
| jak2        | -1           | 1    | 0        | -1    | -1     | 0   | 0   | -2  |
| ccdc8       | 0            | -1   | -1       | 0     | 0      | 0   | 0   | -2  |
| crebbp      | 0            | -1   | -1       | -1    | 0      | 0   | 1   | -2  |
| ctnna2      | 0            | 0    | -1       | 0     | -1     | 1   | -1  | -2  |
| irf1        | -1           | 0    | 1        | -1    | -1     | 1   | -1  | -2  |
| stat6       | 0            | 0    | -1       | -1    | -1     | 0   | 1   | -2  |
| rela        | -1           | 0    | 0        | 0     | -1     | 1   | -1  | -2  |
| stip1       | -1           | 1    | 1        | 1     | 0      | 0   | 0   | 2   |
| cul2        | 0            | 1    | 0        | 0     | 0      | 0   | 1   | 2   |
| maf         | -1           | 1    | 1        | 0     | 0      | 1   | 0   | 2   |
| atm         | 1            | 1    | 0        | 1     | -1     | 0   | 0   | 2   |
| fancg       | 0            | 1    | 0        | 0     | 1      | 0   | 0   | 2   |
| mxd1        | -1           | 1    | 0        | 1     | 0      | 0   | 1   | 2   |
| g3bp1       | 0            | 0    | -1       | 1     | 1      | 0   | 1   | 2   |
| esrra       | 0            | 1    | -1       | 1     | 1      | 0   | 0   | 2   |
| sumo1       | 1            | 1    | 0        | -1    | 1      | 0   | 0   | 2   |
| cebp        | 0            | 0    | 1        | 1     | 0      | 0   | 0   | 2   |
| fam20c      | 0            | 1    | 1        | 0     | 0      | 0   | 0   | 2   |
| hes1        | 1            | 1    | 1        | 1     | -1     | 0   | -1  | 2   |
| elk1        | -1           | -1   | 1        | 1     | 1      | 0   | 1   | 2   |
| irf6        | 1            | -1   | 1        | -1    | 1      | 1   | 0   | 2   |
| arfgef2     | 1            | 0    | -1       | 1     | 1      | -1  | 1   | 2   |
| prpf40a     | 0            | 0    | 0        | 1     | 1      | -1  | 1   | 2   |
| hmg1        | -1           | 1    | 0        | 1     | 1      | 0   | 0   | 2   |
| bclaf1      | 0            | -1   | 1        | 1     | 0      | 1   | 0   | 2   |
| tfdp1       | 1            | -1   | 0        | 0     | 1      | 0   | 1   | 2   |
| hnf4a       | 0            | 1    | -1       | 1     | 0      | 1   | 0   | 2   |
| smad3       | 0            | -1   | 1        | -1    | 1      | 1   | 1   | 2   |
| dsp         | 1            | 1    | -1       | -1    | 1      | 1   | 0   | 2   |
| nr1h3       | 0            | 0    | 1        | 0     | 0      | 0   | 1   | 2   |
| larp1       | 0            | 0    | 1        | -1    | 1      | 0   | 1   | 2   |
| arid5b      | 0            | 1    | 0        | 1     | 0      | 0   | 0   | 2   |
| emd         | 0            | 1    | 1        | 0     | 1      | 0   | 0   | 3   |
| sympk       | 0            | 0    | 0        | 0     | 1      | 1   | 1   | 3   |
| ep300       | 0            | 1    | 1        | -1    | 0      | 1   | 1   | 3   |
| irak1       | 0            | 0    | 1        | -1    | 1      | 1   | 1   | 3   |
| ptprj       | -1           | 1    | 1        | 0     | 0      | 1   | 1   | 3   |
| egfr        | 0            | 1    | 1        | 1     | 1      | -1  | 0   | 3   |
| neu1        | -1           | 1    | 1        | 1     | 1      | -1  | 1   | 3   |
| fosl2       | -1           | 1    | 0        | 1     | 0      | 1   | 1   | 3   |
| csnk2a2     | 0            | 1    | 1        | -1    | 1      | 0   | 1   | 3   |
| zc3h18      | 0            | 1    | 0        | 0     | 0      | 1   | 1   | 3   |
| itch        | 0            | 1    | 0        | 1     | 0      | 0   | 1   | 3   |
| irf5        | 0            | 1    | 0        | 1     | 0      | 0   | 1   | 3   |
| csnk2a1     | 0            | 1    | 1        | 1     | 1      | 0   | 1   | 5   |

**D**

| GO biological process complete                                          | raw P value | ▲ FDR    |
|-------------------------------------------------------------------------|-------------|----------|
| positive regulation of transcription by RNA polymerase II               | 1.51E-21    | 2.39E-17 |
| positive regulation of nitrogen compound metabolic process              | 4.95E-21    | 3.93E-17 |
| positive regulation of gene expression                                  | 1.06E-20    | 4.19E-17 |
| positive regulation of macromolecule biosynthetic process               | 9.05E-21    | 4.80E-17 |
| positive regulation of cellular biosynthetic process                    | 5.22E-20    | 1.18E-16 |
| positive regulation of RNA metabolic process                            | 4.73E-20    | 1.25E-16 |
| positive regulation of biosynthetic process                             | 9.15E-20    | 1.32E-16 |
| positive regulation of macromolecule metabolic process                  | 4.24E-20    | 1.35E-16 |
| positive regulation of RNA biosynthetic process                         | 8.88E-20    | 1.41E-16 |
| positive regulation of nucleic acid-templated transcription             | 8.71E-20    | 1.54E-16 |
| regulation of transcription by RNA polymerase II                        | 8.49E-20    | 1.69E-16 |
| regulation of transcription, DNA-templated                              | 1.44E-19    | 1.90E-16 |
| positive regulation of transcription, DNA-templated                     | 1.70E-19    | 1.93E-16 |
| positive regulation of metabolic process                                | 1.58E-19    | 1.93E-16 |
| regulation of cellular macromolecule biosynthetic process               | 3.67E-19    | 3.43E-16 |
| regulation of RNA biosynthetic process                                  | 3.53E-19    | 3.50E-16 |
| regulation of nucleic acid-templated transcription                      | 3.33E-19    | 3.53E-16 |
| regulation of RNA metabolic process                                     | 8.55E-19    | 7.55E-16 |
| positive regulation of nucleobase-containing compound metabolic process | 1.01E-18    | 8.48E-16 |
| regulation of macromolecule biosynthetic process                        | 1.41E-18    | 1.12E-15 |
| positive regulation of cellular metabolic process                       | 3.80E-18    | 2.87E-15 |
| regulation of cellular biosynthetic process                             | 6.84E-18    | 4.94E-15 |
| regulation of biosynthetic process                                      | 1.54E-17    | 1.02E-14 |
| regulation of nucleobase-containing compound metabolic process          | 1.49E-17    | 1.03E-14 |
| positive regulation of cellular process                                 | 2.05E-17    | 1.31E-14 |
| positive regulation of biological process                               | 3.21E-16    | 1.96E-13 |
| response to stress                                                      | 4.61E-16    | 2.61E-13 |
| cellular response to chemical stimulus                                  | 4.60E-16    | 2.71E-13 |
