# Supplementary material for: Reconstructed signaling and regulatory networks identify potential drugs for SARS-CoV-2 infection
Source: bioRxiv or medRxiv preprint supplement (doi:10.1101/2020.06.01.127589), 2021-12-09
Supplement: Supplementary file [file media-5.pdf]

# Top 1000 gene pairs analysis for scRNA-seq SDREM model with protein phosphorylation data integrated

**A**

|      | 0        | 1        | 2        | 3        | 4        | 5        | 6        |
|------|----------|----------|----------|----------|----------|----------|----------|
| 0.01 | 0.523602 | 1.99E-06 | 0.02703  | 1        | 1        | 1        | 1        |
| 0.05 | 0.523602 | 2.50E-06 | 5.17E-05 | 0.342316 | 1        | 1        | 1        |
| 0.1  | 0.523602 | 2.77E-05 | 4.84E-09 | 0.002397 | 0.032196 | 0.033228 | 1        |
| 0.15 | 0.523602 | 0.001292 | 8.95E-09 | 2.50E-06 | 0.047471 | 0.116503 | 1        |
| 0.2  | 0.523602 | 0.003989 | 2.34E-10 | 1.02E-06 | 0.019243 | 0.247364 | 1        |
| 0.25 | 0.523602 | 0.004596 | 4.50E-11 | 2.67E-09 | 0.012452 | 0.096478 | 1        |
| 0.3  | 0.523602 | 0.016461 | 7.61E-09 | 7.47E-07 | 0.002029 | 0.014349 | 0.018781 |

**B**

|      | 0   | 1   | 2  | 3  | 4  | 5 | 6 |
|------|-----|-----|----|----|----|---|---|
| 0.01 | 143 | 28  | 2  | 0  | 0  | 0 | 0 |
| 0.05 | 143 | 73  | 14 | 1  | 0  | 0 | 0 |
| 0.1  | 143 | 96  | 34 | 7  | 2  | 1 | 0 |
| 0.15 | 143 | 101 | 45 | 16 | 3  | 1 | 0 |
| 0.2  | 143 | 109 | 59 | 21 | 5  | 1 | 0 |
| 0.25 | 143 | 116 | 71 | 30 | 7  | 2 | 0 |
| 0.3  | 143 | 116 | 74 | 29 | 10 | 4 | 2 |

**C**

| gene_symbol | hypertension | COPD | diabetes | smoke | cancer | sex | age | sum |
|-------------|--------------|------|----------|-------|--------|-----|-----|-----|
| nr3c1       | -1           | -1   | -1       | -1    | -1     | 0   | 0   | -5  |
| cd81        | 0            | -1   | -1       | -1    | -1     | -1  | 0   | -5  |
| cav1        | -1           | -1   | -1       | -1    | -1     | 1   | 0   | -4  |
| fas         | -1           | 0    | -1       | 0     | -1     | -1  | 0   | -4  |
| jun         | -1           | 1    | -1       | -1    | -1     | -1  | 0   | -4  |
| hspa8       | -1           | -1   | 0        | 0     | 0      | -1  | 0   | -3  |
| hax1        | -1           | -1   | 0        | -1    | 1      | -1  | 0   | -3  |
| erbb2       | 1            | -1   | 0        | -1    | -1     | 0   | -1  | -3  |
| srf         | -1           | 1    | -1       | -1    | -1     | 0   | 0   | -3  |
| fos         | -1           | 0    | 1        | -1    | -1     | 0   | -1  | -3  |
| acat1       | 0            | -1   | -1       | -1    | 0      | -1  | 1   | -3  |
| apc         | 0            | -1   | -1       | 0     | -1     | 0   | 0   | -3  |
| ctnna1      | 1            | -1   | 0        | -1    | -1     | -1  | 0   | -3  |
| brd2        | -1           | 1    | -1       | -1    | -1     | -1  | 1   | -3  |
| mcm3ap      | 0            | -1   | 0        | -1    | 0      | -1  | 0   | -3  |
| scai        | 0            | 0    | 0        | 1     | -1     | -1  | -1  | -2  |
| myc         | -1           | 1    | 0        | 0     | 0      | -1  | -1  | -2  |
| aar2        | -1           | 0    | 0        | -1    | 0      | -1  | 1   | -2  |
| akap8l      | 0            | -1   | -1       | 0     | 0      | -1  | 1   | -2  |
| atf3        | -1           | 1    | 0        | 0     | -1     | 0   | -1  | -2  |
| rxra        | 0            | -1   | 0        | -1    | -1     | 0   | 1   | -2  |
| stx4        | -1           | -1   | 0        | 0     | 0      | 0   | 0   | -2  |
| creb1       | 0            | -1   | 1        | 1     | -1     | -1  | -1  | -2  |
| junb        | -1           | 1    | 0        | 0     | -1     | -1  | 0   | -2  |
| jak2        | -1           | 1    | 0        | -1    | -1     | 0   | 0   | -2  |
| ccdc8       | 0            | -1   | -1       | 0     | 0      | 0   | 0   | -2  |
| crebbp      | 0            | -1   | -1       | -1    | 0      | 0   | 1   | -2  |
| ctnna2      | 0            | 0    | -1       | 0     | -1     | 1   | -1  | -2  |
| rnf213      | -1           | -1   | 0        | 0     | 0      | -1  | 1   | -2  |
| clu         | 1            | -1   | -1       | -1    | -1     | 0   | 1   | -2  |
| rela        | -1           | 0    | 0        | 0     | -1     | 1   | -1  | -2  |
| stip1       | -1           | 1    | 1        | 1     | 0      | 0   | 0   | 2   |
| cul2        | 0            | 1    | 0        | 0     | 0      | 0   | 1   | 2   |
| atm         | 1            | 1    | 0        | 1     | -1     | 0   | 0   | 2   |
| fancg       | 0            | 1    | 0        | 0     | 1      | 0   | 0   | 2   |
| sarm1       | 0            | 0    | 0        | 1     | 1      | -1  | 1   | 2   |
| golga5      | 0            | 1    | 1        | 0     | 0      | 0   | 0   | 2   |
| pabpc4      | 0            | 0    | 1        | 0     | 0      | 1   | 0   | 2   |
| g3bp1       | 0            | 0    | -1       | 1     | 1      | 0   | 1   | 2   |
| nr2c2       | 1            | -1   | 0        | 1     | 0      | 0   | 1   | 2   |
| sumo1       | 1            | 1    | 0        | -1    | 1      | 0   | 0   | 2   |
| rif1        | 0            | 1    | 0        | 0     | -1     | 1   | 1   | 2   |
| fam20c      | 0            | 1    | 1        | 0     | 0      | 0   | 0   | 2   |
| arfgef2     | 1            | 0    | -1       | 1     | 1      | -1  | 1   | 2   |
| prpf40a     | 0            | 0    | 0        | 1     | 1      | -1  | 1   | 2   |
| tut1        | 1            | 1    | 0        | 0     | 0      | 0   | 0   | 2   |
| hmga1       | -1           | 1    | 0        | 1     | 1      | 0   | 0   | 2   |
| ca12        | 1            | 0    | 0        | 1     | 1      | -1  | 0   | 2   |
| bclaf1      | 0            | -1   | 1        | 1     | 0      | 1   | 0   | 2   |
| tfdp1       | 1            | -1   | 0        | 0     | 1      | 0   | 1   | 2   |
| hnf4a       | 0            | 1    | -1       | 1     | 0      | 1   | 0   | 2   |
| smad3       | 0            | -1   | 1        | -1    | 1      | 1   | 1   | 2   |
| dsp         | 1            | 1    | -1       | -1    | 1      | 1   | 0   | 2   |
| psat1       | 0            | 1    | 1        | 0     | 0      | 0   | 0   | 2   |
| larp1       | 0            | 0    | 1        | -1    | 1      | 0   | 1   | 2   |
| taf4        | 1            | 0    | 0        | 0     | 1      | 0   | 0   | 2   |
| emd         | 0            | 1    | 1        | 0     | 1      | 0   | 0   | 3   |
| sympk       | 0            | 0    | 0        | 0     | 1      | 1   | 1   | 3   |
| ep300       | 0            | 1    | 1        | -1    | 0      | 1   | 1   | 3   |
| rab1a       | 0            | 1    | 1        | -1    | 1      | 0   | 1   | 3   |
| irak1       | 0            | 0    | 1        | -1    | 1      | 1   | 1   | 3   |
| ptprj       | -1           | 1    | 1        | 0     | 0      | 1   | 1   | 3   |
| egfr        | 0            | 1    | 1        | 1     | 1      | -1  | 0   | 3   |
| neu1        | -1           | 1    | 1        | 1     | 1      | -1  | 1   | 3   |
| csnk2a2     | 0            | 1    | 1        | -1    | 1      | 0   | 1   | 3   |
| zc3h18      | 0            | 1    | 0        | 0     | 0      | 1   | 1   | 3   |
| fgb         | -1           | 1    | 1        | 1     | 1      | 1   | -1  | 3   |
| plau        | 0            | 0    | 0        | 1     | 1      | 1   | 0   | 3   |
| itch        | 0            | 1    | 0        | 1     | 0      | 0   | 1   | 3   |
| ssbp1       | 0            | 1    | 1        | 1     | 1      | 0   | 0   | 4   |
| bet1        | 1            | 1    | 0        | 0     | 1      | 0   | 1   | 4   |

**D**

| GO biological process complete                                             | raw P value | ▲ FDR    |
|----------------------------------------------------------------------------|-------------|----------|
| <a href="#">response to stress</a>                                         | 4.38E-14    | 6.96E-10 |
| <a href="#">symbiotic process</a>                                          | 1.53E-13    | 8.12E-10 |
| <a href="#">positive regulation of nitrogen compound metabolic process</a> | 1.14E-13    | 9.09E-10 |
| <a href="#">positive regulation of cellular process</a>                    | 2.39E-13    | 9.50E-10 |
| <a href="#">positive regulation of metabolic process</a>                   | 3.48E-13    | 1.11E-09 |
| <a href="#">positive regulation of cellular metabolic process</a>          | 7.15E-13    | 1.62E-09 |
| <a href="#">positive regulation of macromolecule metabolic process</a>     | 6.42E-13    | 1.70E-09 |
| <a href="#">viral process</a>                                              | 1.64E-12    | 3.27E-09 |
| <a href="#">response to organic substance</a>                              | 3.24E-12    | 5.72E-09 |
| <a href="#">positive regulation of biological process</a>                  | 3.99E-12    | 6.34E-09 |
| <a href="#">regulation of cell communication</a>                           | 4.92E-12    | 7.12E-09 |
| <a href="#">regulation of signaling</a>                                    | 6.97E-12    | 9.24E-09 |
| <a href="#">positive regulation of gene expression</a>                     | 8.10E-12    | 9.90E-09 |
| <a href="#">regulation of signal transduction</a>                          | 1.25E-11    | 1.32E-08 |
| <a href="#">organic substance metabolic process</a>                        | 1.18E-11    | 1.34E-08 |
| <a href="#">macromolecule metabolic process</a>                            | 2.48E-11    | 2.46E-08 |
| <a href="#">regulation of response to stimulus</a>                         | 2.96E-11    | 2.62E-08 |
| <a href="#">gene expression</a>                                            | 2.83E-11    | 2.65E-08 |
| <a href="#">cellular response to chemical stimulus</a>                     | 3.46E-11    | 2.90E-08 |
| <a href="#">positive regulation of transcription by RNA polymerase II</a>  | 4.96E-11    | 3.94E-08 |
| <a href="#">gland development</a>                                          | 5.33E-11    | 4.03E-08 |
| <a href="#">cellular response to stress</a>                                | 6.53E-11    | 4.72E-08 |
| <a href="#">cellular response to organic substance</a>                     | 8.04E-11    | 5.56E-08 |
| <a href="#">primary metabolic process</a>                                  | 1.08E-10    | 6.63E-08 |
| <a href="#">cellular metabolic process</a>                                 | 1.08E-10    | 6.89E-08 |
| <a href="#">metabolic process</a>                                          | 1.07E-10    | 7.07E-08 |
| <a href="#">interspecies interaction between organisms</a>                 | 1.37E-10    | 8.07E-08 |
| <a href="#">response to chemical</a>                                       | 1.63E-10    | 9.25E-08 |
| <a href="#">regulation of apoptotic process</a>                            | 1.99E-10    | 1.05E-07 |
| <a href="#">positive regulation of cellular biosynthetic process</a>       | 1.93E-10    | 1.06E-07 |
| <a href="#">regulation of cell death</a>                                   | 2.45E-10    | 1.25E-07 |
